# Supplementary material for: Novel Approach to Cluster Patient-Generated Data Into Actionable Topics: Case Study of a Web-Based Breast Cancer Forum
Source: PubMed Central journal article supplement (PMC6293240; doi:10.2196/medinform.9162), 2018-11-29
Supplement: medinform_v6i4e45_app1.pdf [file medinform_v6i4e45_app1.pdf]

*This is a Multimedia Appendix to a full manuscript published in the J Med Internet Res. For full copyright and citation information see <http://dx.doi.org/10.2196/jmir.9162-150423-1>*

## MULTIMEDIA APPENDIX I.

The 80 forums and their groupings on the Breastcancer.org Community website

| Section                                                    | File number          | Forum                                                       | Threads |
|------------------------------------------------------------|----------------------|-------------------------------------------------------------|---------|
| <b>Welcome to Breastcancer.org</b>                         | 131                  | Information and resources for new patients, and new members | 15      |
|                                                            | 135                  | Acknowledging and honoring our Community                    | 82      |
| <b>Not Diagnosed but Concerned</b>                         | 83                   | Not Diagnosed but Worried                                   | 12183   |
|                                                            | 62                   | Waiting for Test Results                                    | 4844    |
|                                                            | 148                  | Benign Breast Conditions                                    | 207     |
|                                                            | 47                   | High Risk for Breast Cancer                                 | 1745    |
| <b>Tests, Treatments, Side Effects</b>                     | 5                    | Just Diagnosed                                              | 5487    |
|                                                            | 147                  | Diagnosed and Waiting for Test Results                      | 161     |
|                                                            | 6                    | Help Me Get Through Treatment                               | 2855    |
|                                                            | 91                   | Surgery - Before, During, and After                         | 5998    |
|                                                            | 44                   | Breast Reconstruction                                       | 9384    |
|                                                            | 82                   | Living Without Reconstruction After a Mastectomy            | 1052    |
|                                                            | 64                   | Lymphedema                                                  | 4510    |
|                                                            | 136                  | Pain                                                        | 266     |
|                                                            | 69                   | Chemotherapy - Before, During, and After                    | 6026    |
|                                                            | 70                   | Radiation Therapy - Before, During and After                | 2787    |
|                                                            | 78                   | Hormonal Therapy - Before, During and After                 | 5692    |
|                                                            | 79                   | Complementary and Holistic Medicine and Treatment           | 2412    |
| 121                                                        | Alternative Medicine | 438                                                         |         |
| <b>Connecting With Others Who Have a Similar Diagnosis</b> | 68                   | DCIS (Ductal Carcinoma In Situ)                             | 3197    |
|                                                            | 111                  | Micro-invasive DCIS that is HER2 positive                   | 51      |
|                                                            | 95                   | LCIS (Lobular Carcinoma In Situ)                            | 478     |

|     |                                                             |       |
|-----|-------------------------------------------------------------|-------|
| 96  | IDC (Invasive Ductal Carcinoma)                             | 2387  |
| 81  | IBC (Inflammatory Breast Cancer)                            | 1268  |
| 71  | ILC (Invasive Lobular Carcinoma)                            | 1013  |
| 137 | Less Common Types of Breast Cancer                          | 84    |
| 132 | Mixed Type Breast Cancer                                    | 47    |
| 142 | Breast Cancer with Another Diagnosis or Comorbidity         | 78    |
| 108 | Stage I Breast Cancer                                       | 1016  |
| 145 | Stage II Breast Cancer                                      | 133   |
| 67  | Stage III Breast Cancer                                     | 3375  |
| 8   | Stage IV and Metastatic Breast Cancer ONLY                  | 19880 |
| 105 | Not Diagnosed With a Recurrence or Metastases but Concerned | 1820  |
| 106 | Just Diagnosed With a Recurrence or Metastasis              | 684   |
| 88  | Second or Third Breast Cancer                               | 361   |
| 80  | HER2+ (Positive) Breast Cancer                              | 1600  |
| 72  | Triple-Negative Breast Cancer                               | 1866  |
| 112 | BRCA1 or BRCA2 Positive                                     | 328   |
| 51  | Male Breast Cancer                                          | 171   |
| 77  | Palliative Therapy/Hospice Care                             | 177   |

|                           |     |                                                                |      |
|---------------------------|-----|----------------------------------------------------------------|------|
| <b>Day-to-Day Matters</b> | 150 | Sex Matters                                                    | 33   |
|                           | 152 | Share Your Experiences Of Life After A Breast Cancer Diagnosis | 32   |
|                           | 156 | Your Furry Friends                                             | 3    |
|                           | 120 | Bone Health and Bone Loss                                      | 148  |
|                           | 133 | Coping with Holidays, Special Days and Anniversaries           | 62   |
|                           | 113 | Employment, Insurance, and Other Financial Issues              | 569  |
|                           | 102 | Relationships, Emotional Crises, Anxiety, and Depression       | 1207 |
|                           | 58  | Fitness and Getting Back in Shape                              | 675  |
|                           | 86  | Healthy Recipes for Everyday Living                            | 651  |
|                           | 31  | Humor and Games                                                | 1799 |
|                           | 26  | Recommend Your Resources                                       | 563  |
|                           | 149 | BCO Free-Cycle: Give or trade items related to breast cancer   | 22   |

|                                      |     |                                                                  |      |
|--------------------------------------|-----|------------------------------------------------------------------|------|
|                                      | 73  | Clinical Trials, Research Studies, News, and Study Results       | 4829 |
| <b>Recovery, Renewal, Hope</b>       | 7   | Moving Beyond Cancer                                             | 2972 |
|                                      | 84  | Growing our Friendships After Treatment                          | 474  |
|                                      | 23  | Biographies and Inspiring Stories                                | 294  |
|                                      | 38  | Prayers and Spiritual Inspiration                                | 784  |
| <b>Support Community Connections</b> | 144 | For Family and Caregivers of Members with STAGE IV Diagnosis     | 211  |
|                                      | 153 | Member Matchup                                                   | 6    |
|                                      | 16  | For Caregivers, Family, Friends and Supporters                   | 1340 |
|                                      | 138 | Australian and New Zealand Breast Cancer Survivors               | 30   |
|                                      | 55  | Canadian Breast Cancer Survivors                                 | 641  |
|                                      | 139 | International, Non-English Speakers with Breast Cancer           | 11   |
|                                      | 98  | African Americans with Breast Cancer                             | 166  |
|                                      | 141 | Latinas/Hispanics with Breast Cancer                             | 6    |
|                                      | 99  | Singles with Breast Cancer                                       | 167  |
|                                      | 76  | LGBT with Breast Cancer                                          | 179  |
|                                      | 27  | Young With Breast Cancer                                         | 726  |
|                                      | 109 | Middle Age (40-60(ish) Years with Breast Cancer                  | 231  |
|                                      | 104 | Older than 60 Years with Breast Cancer                           | 206  |
|                                      | 85  | High Risk of Recurrence or Second Breast Cancer                  | 237  |
|                                      | 56  | Commemorating Loved Ones                                         | 130  |
|                                      | 61  | BC.org Chatters                                                  | 309  |
|                                      | 34  | Get Togethers                                                    | 368  |
|                                      | 63  | Walks, Runs and Fundraising Events for Breastcancer.org          | 311  |
| <b>Site News and Announcements</b>   | 93  | Comments, Suggestions, Feature Requests                          | 496  |
|                                      | 90  | Mod Announcements, Breastcancer.org News, Blog Entries, Podcasts | 40   |
| <b>Advocacy and Fund-Raising</b>     | 114 | Fundraising Opportunities for Breastcancer.org                   | 16   |
|                                      | 110 | Advocacy                                                         | 244  |
|                                      | 100 | Donated to Breastcancer.org in honor of..                        | 64   |
