# Supplementary material for: Novel Approach to Cluster Patient-Generated Data Into Actionable Topics: Case Study of a Web-Based Breast Cancer Forum
Source: PubMed Central journal article supplement (PMC6293240; doi:10.2196/medinform.9162), 2018-11-29
Supplement: medinform_v6i4e45_app2.pdf [file medinform_v6i4e45_app2.pdf]

*This is a Multimedia Appendix to a full manuscript published in the J Med Internet Res. For full copyright and citation information see <http://dx.doi.org/10.2196/jmir.9162-150423-1>*

### MULTIMEDIA APPENDIX III.

File-feature set. Each file represents the text of one forum, and topic-strength pairs for the strongest five topics per MALLET LDA analysis of that file are found to the right of the file's ID. For any file, the strength across all 30 topics will always add up to 1.00.

| File ID | Topic ID | Strength | Topic ID | Strength | Topic ID | Strength | Topic ID | Strength | Topic ID | Strength |
|---------|----------|----------|----------|----------|----------|----------|----------|----------|----------|----------|
| F100    | 12       | 0.275    | 18       | 0.269    | 2        | 0.251    | 5        | 0.06     | 7        | 0.053    |
| F102    | 2        | 0.542    | 18       | 0.136    | 7        | 0.087    | 12       | 0.056    | 1        | 0.04     |
| F104    | 2        | 0.315    | 14       | 0.118    | 1        | 0.104    | 7        | 0.09     | 20       | 0.043    |
| F105    | 2        | 0.295    | 11       | 0.25     | 6        | 0.213    | 7        | 0.067    | 14       | 0.042    |
| F106    | 2        | 0.311    | 1        | 0.148    | 11       | 0.143    | 19       | 0.131    | 3        | 0.06     |
| F108    | 2        | 0.3      | 1        | 0.219    | 4        | 0.101    | 3        | 0.099    | 14       | 0.071    |
| F109    | 2        | 0.34     | 14       | 0.11     | 1        | 0.1      | 7        | 0.094    | 5        | 0.071    |
| F110    | 13       | 0.319    | 12       | 0.296    | 2        | 0.191    | 6        | 0.051    | 15       | 0.039    |
| F111    | 4        | 0.374    | 2        | 0.214    | 3        | 0.168    | 1        | 0.132    | 7        | 0.037    |
| F112    | 15       | 0.439    | 2        | 0.278    | 1        | 0.089    | 7        | 0.045    | 12       | 0.033    |
| F113    | 12       | 0.544    | 2        | 0.273    | 7        | 0.047    | 1        | 0.026    | 10       | 0.019    |
| F114    | 12       | 0.513    | 2        | 0.22     | 13       | 0.109    | 5        | 0.078    | 7        | 0.04     |
| F120    | 14       | 0.475    | 2        | 0.181    | 7        | 0.106    | 13       | 0.073    | 9        | 0.064    |
| F121    | 9        | 0.286    | 2        | 0.238    | 13       | 0.206    | 4        | 0.059    | 7        | 0.052    |
| F131    | 12       | 0.405    | 13       | 0.234    | 2        | 0.113    | 15       | 0.061    | 1        | 0.056    |
| F132    | 1        | 0.249    | 2        | 0.214    | 4        | 0.202    | 3        | 0.103    | 15       | 0.073    |
| F133    | 2        | 0.42     | 5        | 0.223    | 18       | 0.123    | 7        | 0.113    | 12       | 0.046    |
| F135    | 2        | 0.343    | 18       | 0.137    | 7        | 0.133    | 12       | 0.105    | 1        | 0.092    |
| F136    | 2        | 0.295    | 17       | 0.217    | 14       | 0.097    | 7        | 0.08     | 6        | 0.06     |
| F137    | 1        | 0.247    | 2        | 0.201    | 6        | 0.173    | 3        | 0.127    | 4        | 0.115    |
| F138    | 2        | 0.278    | 5        | 0.2      | 7        | 0.143    | 1        | 0.109    | 12       | 0.096    |
| F139    | 5        | 0.76     | 2        | 0.058    | 12       | 0.037    | 15       | 0.03     | 1        | 0.029    |
| F141    | 5        | 0.312    | 20       | 0.22     | 12       | 0.132    | 15       | 0.113    | 2        | 0.113    |
| F142    | 2        | 0.318    | 14       | 0.166    | 1        | 0.086    | 7        | 0.077    | 11       | 0.072    |
| F144    | 2        | 0.464    | 18       | 0.182    | 19       | 0.155    | 1        | 0.082    | 7        | 0.056    |
| F145    | 2        | 0.317    | 1        | 0.255    | 3        | 0.109    | 11       | 0.068    | 14       | 0.056    |
| F147    | 1        | 0.293    | 2        | 0.28     | 7        | 0.094    | 6        | 0.09     | 16       | 0.05     |
| F148    | 6        | 0.615    | 2        | 0.183    | 15       | 0.05     | 4        | 0.044    | 7        | 0.032    |
| F149    | 17       | 0.311    | 12       | 0.25     | 2        | 0.173    | 7        | 0.095    | 16       | 0.085    |
| F150    | 2        | 0.4      | 14       | 0.252    | 7        | 0.082    | 10       | 0.061    | 5        | 0.056    |
| F152    | 2        | 0.492    | 7        | 0.147    | 18       | 0.081    | 12       | 0.056    | 1        | 0.054    |

|             |    |       |    |       |    |       |    |       |    |       |
|-------------|----|-------|----|-------|----|-------|----|-------|----|-------|
| <b>F153</b> | 12 | 0.377 | 2  | 0.175 | 7  | 0.085 | 1  | 0.083 | 20 | 0.058 |
| <b>F156</b> | 2  | 0.328 | 5  | 0.303 | 12 | 0.149 | 18 | 0.126 | 7  | 0.046 |
| <b>F16</b>  | 2  | 0.466 | 18 | 0.21  | 1  | 0.138 | 7  | 0.055 | 12 | 0.038 |
| <b>F23</b>  | 2  | 0.327 | 1  | 0.138 | 18 | 0.119 | 5  | 0.085 | 7  | 0.075 |
| <b>F26</b>  | 13 | 0.235 | 2  | 0.197 | 12 | 0.184 | 9  | 0.086 | 7  | 0.078 |
| <b>F27</b>  | 2  | 0.387 | 1  | 0.161 | 14 | 0.071 | 15 | 0.067 | 7  | 0.062 |
| <b>F31</b>  | 5  | 0.493 | 2  | 0.231 | 7  | 0.154 | 18 | 0.043 | 12 | 0.037 |
| <b>F34</b>  | 5  | 0.294 | 7  | 0.234 | 2  | 0.207 | 12 | 0.111 | 1  | 0.059 |
| <b>F38</b>  | 18 | 0.573 | 2  | 0.222 | 7  | 0.088 | 5  | 0.056 | 12 | 0.019 |
| <b>F44</b>  | 10 | 0.542 | 2  | 0.231 | 7  | 0.092 | 17 | 0.056 | 12 | 0.02  |
| <b>F47</b>  | 15 | 0.353 | 2  | 0.242 | 6  | 0.15  | 4  | 0.066 | 7  | 0.042 |
| <b>F5</b>   | 1  | 0.333 | 2  | 0.33  | 4  | 0.092 | 6  | 0.059 | 7  | 0.056 |
| <b>F51</b>  | 2  | 0.29  | 6  | 0.2   | 1  | 0.102 | 15 | 0.062 | 12 | 0.061 |
| <b>F55</b>  | 2  | 0.255 | 12 | 0.223 | 1  | 0.093 | 7  | 0.086 | 10 | 0.063 |
| <b>F56</b>  | 18 | 0.464 | 2  | 0.289 | 7  | 0.064 | 5  | 0.061 | 19 | 0.046 |
| <b>F58</b>  | 7  | 0.424 | 2  | 0.223 | 9  | 0.093 | 10 | 0.056 | 8  | 0.053 |
| <b>F6</b>   | 2  | 0.338 | 16 | 0.249 | 1  | 0.098 | 7  | 0.092 | 14 | 0.05  |
| <b>F61</b>  | 2  | 0.256 | 18 | 0.255 | 12 | 0.079 | 1  | 0.079 | 7  | 0.07  |
| <b>F62</b>  | 6  | 0.467 | 2  | 0.266 | 1  | 0.1   | 7  | 0.061 | 4  | 0.027 |
| <b>F63</b>  | 12 | 0.33  | 5  | 0.219 | 7  | 0.19  | 2  | 0.169 | 13 | 0.055 |
| <b>F64</b>  | 8  | 0.499 | 2  | 0.247 | 7  | 0.126 | 12 | 0.04  | 17 | 0.026 |
| <b>F67</b>  | 2  | 0.396 | 11 | 0.17  | 7  | 0.1   | 1  | 0.078 | 16 | 0.038 |
| <b>F68</b>  | 4  | 0.555 | 2  | 0.282 | 7  | 0.046 | 1  | 0.037 | 6  | 0.036 |
| <b>F69</b>  | 16 | 0.411 | 2  | 0.307 | 7  | 0.115 | 1  | 0.063 | 3  | 0.03  |
| <b>F7</b>   | 2  | 0.364 | 5  | 0.194 | 7  | 0.109 | 12 | 0.091 | 18 | 0.046 |
| <b>F70</b>  | 20 | 0.357 | 2  | 0.299 | 7  | 0.103 | 1  | 0.056 | 4  | 0.047 |
| <b>F71</b>  | 2  | 0.263 | 1  | 0.241 | 15 | 0.104 | 6  | 0.064 | 4  | 0.063 |
| <b>F72</b>  | 3  | 0.3   | 2  | 0.296 | 1  | 0.12  | 7  | 0.065 | 13 | 0.037 |
| <b>F73</b>  | 13 | 0.638 | 2  | 0.114 | 12 | 0.059 | 7  | 0.042 | 9  | 0.032 |
| <b>F76</b>  | 2  | 0.369 | 5  | 0.268 | 12 | 0.125 | 7  | 0.065 | 18 | 0.037 |
| <b>F77</b>  | 2  | 0.424 | 18 | 0.324 | 19 | 0.105 | 7  | 0.07  | 12 | 0.044 |
| <b>F78</b>  | 14 | 0.521 | 2  | 0.253 | 7  | 0.086 | 13 | 0.03  | 1  | 0.022 |
| <b>F79</b>  | 9  | 0.382 | 2  | 0.198 | 13 | 0.195 | 7  | 0.068 | 14 | 0.063 |
| <b>F8</b>   | 2  | 0.365 | 19 | 0.341 | 7  | 0.092 | 12 | 0.045 | 11 | 0.024 |
| <b>F80</b>  | 3  | 0.482 | 2  | 0.279 | 7  | 0.068 | 14 | 0.045 | 1  | 0.028 |
| <b>F81</b>  | 2  | 0.263 | 6  | 0.241 | 20 | 0.213 | 1  | 0.082 | 19 | 0.05  |
| <b>F82</b>  | 17 | 0.452 | 2  | 0.289 | 7  | 0.1   | 10 | 0.08  | 12 | 0.04  |
| <b>F83</b>  | 6  | 0.584 | 2  | 0.255 | 7  | 0.048 | 15 | 0.03  | 1  | 0.026 |
| <b>F84</b>  | 5  | 0.419 | 2  | 0.276 | 7  | 0.15  | 18 | 0.05  | 12 | 0.041 |
| <b>F85</b>  | 2  | 0.252 | 15 | 0.169 | 4  | 0.08  | 1  | 0.08  | 3  | 0.08  |
| <b>F86</b>  | 9  | 0.67  | 2  | 0.13  | 7  | 0.112 | 13 | 0.037 | 5  | 0.026 |

|            |    |       |    |       |    |       |    |       |    |       |
|------------|----|-------|----|-------|----|-------|----|-------|----|-------|
| <b>F88</b> | 2  | 0.304 | 1  | 0.181 | 4  | 0.118 | 3  | 0.075 | 11 | 0.075 |
| <b>F90</b> | 12 | 0.324 | 13 | 0.224 | 2  | 0.175 | 7  | 0.065 | 18 | 0.06  |
| <b>F91</b> | 2  | 0.299 | 17 | 0.249 | 10 | 0.104 | 7  | 0.096 | 1  | 0.091 |
| <b>F93</b> | 12 | 0.464 | 2  | 0.336 | 7  | 0.069 | 13 | 0.039 | 4  | 0.025 |
| <b>F95</b> | 15 | 0.347 | 2  | 0.244 | 4  | 0.174 | 6  | 0.089 | 7  | 0.042 |
| <b>F96</b> | 2  | 0.297 | 1  | 0.292 | 4  | 0.099 | 3  | 0.076 | 7  | 0.057 |
| <b>F98</b> | 2  | 0.285 | 16 | 0.13  | 5  | 0.097 | 18 | 0.094 | 7  | 0.076 |
| <b>F99</b> | 2  | 0.461 | 5  | 0.205 | 7  | 0.108 | 12 | 0.064 | 18 | 0.05  |

(...to 30 topics)
