# Supplementary material for: Novel Approach to Cluster Patient-Generated Data Into Actionable Topics: Case Study of a Web-Based Breast Cancer Forum
Source: PubMed Central journal article supplement (PMC6293240; doi:10.2196/medinform.9162), 2018-11-29
Supplement: medinform_v6i4e45_app3.pdf [file medinform_v6i4e45_app3.pdf]

*This is a Multimedia Appendix to a full manuscript published in the J Med Internet Res. For full copyright and citation information see <http://dx.doi.org/10.2196/jmir.9162-150423-1>*

## MULTIMEDIA APPENDIX II.

List of topics generated by MALLET in the 30 topic model. The consensus interpretations of the topics are noted as topic labels to the left, and the topic keywords along with overall LDA strength of each topic are shown to the right. The displayed LDA strengths are MALLET-generated for that topic across all forum files and do not always correlate with the strengths found via multiple regression analysis.

| Topic Label                                                       | Topic ID | LDA Strength | Topic Keywords (Basket)                                                                                                                                         |
|-------------------------------------------------------------------|----------|--------------|-----------------------------------------------------------------------------------------------------------------------------------------------------------------|
| <b>Diagnostic testing and waiting for results</b>                 | 1        | 0.34502      | breast biopsy cancer lump results ultrasound benign surgeon mammogram doctor mri waiting back mammo good radiologist feel pain left i'm                         |
| <b>Side effects of inflammation and its treatment</b>             | 2        | 0.1486       | breast ibc skin symptoms pain rash red cancer nipple biopsy infection diagnosed antibiotics swollen treatment left specialist redness swelling lymph            |
| <b>Positive results after recurrence</b>                          | 3        | 0.16302      | chemo stage years cancer treatment nodes onc tumor triple negative taxol positive rads year diagnosed node recurrence congratulations lymph radiation           |
| <b>Friends and fun</b>                                            | 4        | 0.21757      | love year great man live marin i'm show friends meet post men birthday nice favorite fun thread hope watch hair                                                 |
| <b>Prognosis about relapse/recurrence and potential treatment</b> | 5        | 0.29097      | mets pain bone scan hope liver onc stage treatment good news scans results months i'm pet luck brain hear week                                                  |
| <b>diagnostic testing and confirmation</b>                        | 6        | 0.31034      | chemo cancer treatment tumor surgery surgeon lumpectomy biopsy stage nodes grade diagnosed diagnosis node test positive oncotype results information oncologist |
| <b>genetic risks and testing</b>                                  | 7        | 0.25689      | cancer risk breast lcis brca family genetic history test mri years testing diagnosed women tested high mutation gene tamoxifen age                              |
| <b>hope, love, family, friends</b>                                | 8        | 1.38724      | cancer chemo years feel life family mom time support things breast people treatment don't husband care friends diagnosed talk mother                            |
| <b>diagnosis and treatment options for recurrence</b>             | 9        | 0.18974      | dcis cancer radiation risk lumpectomy grade invasive treatment biopsy mastectomy margins diagnosis surgeon tamoxifen mri recurrence breast stage pathology rads |
| <b>radiation treatment (duration and side effects)</b>            | 10       | 0.25876      | radiation rads treatment skin rad treatments chemo breast weeks week area finished onc pain day side start chest started oncologist                             |
| <b>looking for support from people in similar circumstances</b>   | 11       | 1.3873       | post people women site cancer thread stage forum breast agree information posts link read don't support page find list add                                      |

|                                                                        |    |         |                                                                                                                                                 |
|------------------------------------------------------------------------|----|---------|-------------------------------------------------------------------------------------------------------------------------------------------------|
| <b>feeling positive and support</b>                                    | 12 | 0.6806  | i'm feel great good happy time year back day wonderful feeling hugs days people news love it's post positive hope                               |
| <b>looking for clinical research and trial</b>                         | 13 | 0.31412 | cancer breast patients study women research cells drug treatment risk drugs clinical tumor article studies years cell cancers disease trial     |
| <b>medical (drug) treatment and long term effects</b>                  | 14 | 0.2025  | herceptin chemo treatment heart positive onc year cancer weeks stage tumor taxol tch oncologist treatments years recurrence test trial negative |
| <b>physical activities during and after chemo</b>                      | 15 | 0.29143 | exercise weight walk walking back running chemo run week yoga pounds training body started miles lbs gym lose weeks eat                         |
| <b>surgical treatment while in remission</b>                           | 16 | 0.25678 | bra wear bras mastectomy reconstruction breast flat forms form chest recon prosthesis size don't comfortable breasts wearing feel side women    |
| <b>nutrition and supplements</b>                                       | 17 | 0.20384 | cancer eat diet food soy oil vitamin Multimedia Appendix chemo alternative taking good natural foods organic tea read estrogen water sugar      |
| <b>Chemotherapy side effects and change of treatment</b>               | 18 | 0.19378 | chemo hair treatment taxol weeks port day days taxotere started pain onc treatments week effects side wig luck feel start                       |
| <b>feeling back to normal</b>                                          | 19 | 1.50473 | good day time back don't thought put it's i'm work you're i've made life make didn't today night people long                                    |
| <b>side effects of breast cancer treatment</b>                         | 20 | 0.10157 | arm lymphedema sleeve therapist swelling compression hand lymph wear risk glove nodes garments pain binney treatment fluid massage breast it's  |
| <b>side effects while in remission</b>                                 | 21 | 0.16468 | surgery pain surgeon mastectomy drains weeks lumpectomy arm drain hospital days home removed bmx nodes side reconstruction node day recovery    |
| <b>general feelings over time</b>                                      | 22 | 2.40411 | i'm don't it's good time years hope i've find back told lot found long make months doctor didn't ago thing                                      |
| <b>medical (drug) treatment and side effects</b>                       | 23 | 0.2484  | tamoxifen years taking arimidex pain effects side onc tamox estrogen hot femara months flashes started women chemo cancer drug i'm              |
| <b>Financial issues over time</b>                                      | 24 | 0.27058 | insurance health pay cancer company care work year coverage breast money medicare medical hospital plan treatment state job paid bill           |
| <b>support from care giver and medical team for recovery long term</b> | 25 | 0.12625 | great cancer mets xeloda love hope wonderful hugs good news happy working tumor onc progression family stable zometa oncologist enjoy           |
| <b>positive result after treatment for recurrence</b>                  | 26 | 1.01657 | breast cancer surgery mastectomy radiation feel surgeon time decision luck women lumpectomy nodes good back removed tumor left small weeks      |
| <b>surgical reconstruction during in remission</b>                     | 27 | 0.25671 | surgery implants reconstruction breast diep implant side exchange flap skin weeks nipple tissue pain surgeon time fat good feel expanders       |

---

|                                             |    |         |                                                                                                                                          |
|---------------------------------------------|----|---------|------------------------------------------------------------------------------------------------------------------------------------------|
| <b>spirituality and religion</b>            | 28 | 0.15557 | god prayers love pray family peace lord dear prayer hospice praying bless thoughts strength heart mother comfort day hope jesus          |
| <b>every day and breast cancer</b>          | 29 | 0.19954 | hair book pink survivor happy deb health country president shirley obama congratulations cats article eye mammo fumi beth beautiful vote |
| <b>symptoms and diagnosis of recurrence</b> | 30 | 0.21851 | cancer pain scan chemo ilc years onc mri bone recurrence back mets oncologist nodes tumor stage node test scans pet                      |

---
